# Supplementary material for: Male gamete copies to characterize genome inheritance and generate progenies
Source: Research Square preprint supplement (doi:10.21203/rs.3.rs-4682261/v1), 2024-08-09
Supplement: Supplementary file 1 [file 38011c548a5c74d14eeb4888.docx]

Table 1. Haploid androgenetic embryo development

| Haploid Embryo Type | B6D2F1 Androgenetic | | B6-GFP Androgenetic | B6D2F1 Parthenogenetic |
| --- | --- | --- | --- | --- |
| Oocyte Enucleated | 535 | 421 | |  |
| Enucleation Survival (%) | 519/535 (97.0) | 415/421 (98.6) | |  |
| Oocytes Activated |  |  | | 895 |
| 1PN development (%) | 471/519 (90.8) | 351/415 (84.6) | | 863/895 (96.4) |
| 2-Cell Development (%) | 445/471 (94.4) | 322/351 (91.7) | | 116/119¶ (97.5) |
| 4-Cell Development (%) | 129/158 (81.6)* | 281/351 (80.1) | | 102/119 (85.7) |
| 8-Cell Development (%) | 53/72 (73.6)† | 208/351 (59.3) | | 91/119(76.4) |
| Morula Development (%) | 29/43 (67.4)ƒ | 183/330 (55.5)‡ | | 88/119 (73.9) |
| Blastocyst Development (%) | 4/43 (9.3) | 37/330 (11.2) | | 33/119 (27.7) |

*287 2-Cell male haploid embryos allocated for zygote reconstruction

†57 4-Cell male haploid embryos allocated for zygote reconstruction

ƒ10 8-cell male haploid embryos allocated for zygote reconstruction

‡21 8-cell male haploid embryos allocated for zygote reconstruction

¶744 1PN parthenotes allocated for zygote reconstruction
