# Supplementary material for: Male gamete copies to characterize genome inheritance and generate progenies
Source: Research Square preprint supplement (doi:10.21203/rs.3.rs-4682261/v1), 2024-08-09
Supplement: Supplementary file 2 [file 65bd34dd7a105c52ab063165.docx]

Table.4 Pregnancy outcomes after embryo transfer into 2.5-dpc CD-1 surrogate

| Conceptuses | Control | B6D2F1 (2-cell) | B6D2F1 (4-cell) | B6D2F1 (8-cell) | B6-GFP (8-cell) |
| --- | --- | --- | --- | --- | --- |
| Blastocysts Transferred | 94 | 81 | 58 | 16 | 85 |
| Total Number of Recipient | 8 | 7 | 5 | 1 | 12 |
| Pregnant Recipient | 8 | 6 | 5 | 1 | 5 |
| Implantation (%) | 53/94 (56.4) | 17/81 (20.1) | 16/58 (27.6) | 6/16 (37.5) | 15/85 (17.6) |
| Full-term developed (%) | 48/94 (51.1) | 13/81 (16.0) | 12/58 (27.6) | 0/16 (0) | 12/85 (14.1) |
| Live offspring (%) | 48/94 (51.1) | 11/81 (13.6) | 12/58 (27.6) | 0/16 (0) | 10/85 (11.1) |
| Male | 25 (52.1) | 4 (36.4) | 6 (50.0) | 0 | 3 (30.0) |
| Female | 23 (47.9) | 7 (63.6) | 6 (50.0) | 0 | 7 (70.0) |
| Mean weight (g) | 1.76 ± 0.17 | 1.69 ± 0.31 | 1.66 ± 0.12 | N/A | 1.51 ± 0.22 |
| Weaned | 42/48 (93.8) | 6/11 (54.5) | 10/12 (83.3) | N/A | 9/10 (90.0) |
| Abnormal/Cannibalized | 0/6 | 3/2 | 2/0 | N/A | 1/0 |
