# Supplementary material for: Male gamete copies to characterize genome inheritance and generate progenies
Source: Research Square preprint supplement (doi:10.21203/rs.3.rs-4682261/v1), 2024-08-09
Supplement: Supplementary file 3 [file 80a18e6c34d5e82eb7f75759.docx]

Table.3 Preimplantation development of reconstructed zygotes using blastomeres isolated from different stages of haploid androgenetic embryos.

| Conceptuses | Control | B6D2F1 (2-cell) | B6D2F1 (4-cell) | B6D2F1 (8-cell) | B6-GFP (8-cell) | *P* Value |
| --- | --- | --- | --- | --- | --- | --- |
| Oocyte Activation (%) | — | 330/346 (95.3) | 222/223 (99.6) | 30/30 (100) | 162/172 (94.2) | NS |
| ICSI/Reconstruction (%) | 447/481 (92.9) | 254/261 (97.3) | 115/120 (95.8) | 24/24 (100) | 145/148 (97.9) | NS |
| 2PN/Fusion (%) | 437/447 (97.8) | 248/254 (97.6) | 111/115 (96.5) | 23/24 (95.8) | 140/145 (96.6) | NS |
| 2-Cell Development (%) | 426/437 (97.5) | 248/248 (100) | 111/111 (100) | 23/23 (100) | 135/140 (96.4) | NS |
| 4-Cell Development (%) | 410/437 (93.8) | 248/248 (100) | 103/111 (92.8) | 23/23 (100) | 132/140 (94.3) | NS |
| 8-Cell Development (%) | 405/437 (92.7) | 246/248 (99.2) | 101/111 (91.0) | 23/23 (100) | 128/140 (91.4) | NS |
| Morula Compaction (%) | 390/437 (89.2) | 238/248 (96.0) | 96/111 (86.5) | 23/23 (100) | 112/140 (80.0) | <0.001 |
| Blastocyst Development (%) | 353/437 (80.8) | 199/248 (80.2) | 90/111 (81.1) | 18/23 (78.3) | 85/140 (60.7) | <0.0001 |
