# Supplementary material for: Male gamete copies to characterize genome inheritance and generate progenies
Source: Research Square preprint supplement (doi:10.21203/rs.3.rs-4682261/v1), 2024-08-09
Supplement: Supplementary file 4 [file fced5bc12120620e8615dcfb.docx]

Table 2. Cytogenetic of haploid androgenetic embryos

|  |  |  | Chromosomal Complement | |
| --- | --- | --- | --- | --- |
| Blastomere Type | Fixed | Analyzed | Haploid | Abnormal |
| 2-Cell | 26 | 7 | 6 | 1 |
| 4-Cell | 13 | 4 | 4 | 0 |
| 8-Cell | 13 | 6 | 5 | 1 |
| Total | 52 | 17 | 15 | 2 |
